# Supplementary material for: Head-to-tail regulation is critical for the in vivo function of myosin V
Source: PubMed Central journal article supplement — J Cell Biol. 2015 May 11;209(3):359–65. doi: 10.1083/jcb.201411010 (PMC4427785; doi:10.1083/jcb.201411010), 2015-05-11
Supplement: supp_jcb.201411010_JCB_201411010_sm.pdf [file supp_jcb.201411010_JCB_201411010_sm.pdf]

Donovan and Bretscher

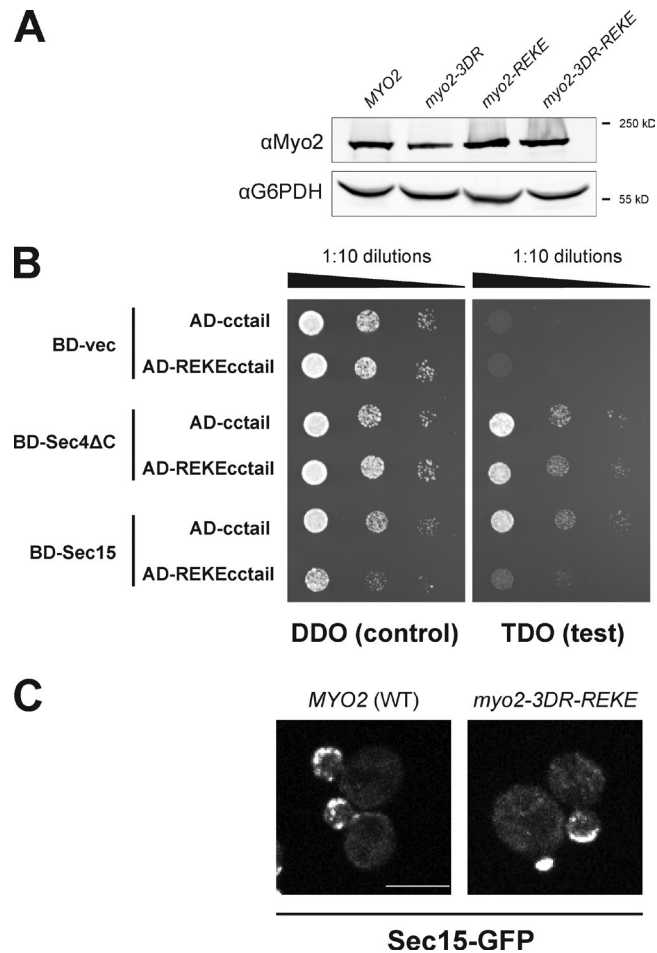

Figure S1. **Charge mutant strains are expressed similarly to wild-type Myo2p and affect Sec15p binding and localization as expected.** (A) Myo2p expression levels in wild-type, *myo2-3DR*, *myo2-REKE*, and *myo2-3DR-REKE* strains. The glucose-6-phosphate dehydrogenase Zwf1p was used as a loading control. (B) Yeast two-hybrid interactions of Myo2p or Myo2-REKEp coiled-coil + tail regions (residues 925–1575) fused to the activation domain (AD), with Sec4ΔCC or Sec15p fused to the binding domain (BD). Sec4p is truncated to remove the C-terminal CXC motif to prevent prenylation. 1:10 serial dilutions were spotted on double-dropout (DDO) SD-Leu-Trp media as a control or triple dropout (TDO) SD-Leu-Trp-His media to test the interaction. Wild-type and Myo2-REKEp cctail constructs can bind to Sec4p, but the Myo2-REKEp cctail is deficient in Sec15p binding. (C) Sec15-GFP localization in wild-type and *myo2-3DR-REKE* strains. Bar, 5 μm.

Table S1. Summary of yeast strains

| Strain  | Alias  | Genotype                                                                             | Source                 |
|---------|--------|--------------------------------------------------------------------------------------|------------------------|
| ABY1655 | BY4741 | MATa <i>his3Δ1 leu2Δ0 met15Δ0 ura3Δ0</i>                                             | C. Boone <sup>a</sup>  |
| ABY1656 | BY4742 | MATα <i>his3Δ1 leu2Δ0 lys2Δ0 ura3Δ0</i>                                              | C. Boone               |
| ABY3587 | NA     | MATα <i>his3Δ1 leu2Δ0 lys2Δ0 ura3Δ0 myo2-3DR::HIS3</i>                               | This study             |
| ABY3588 | NA     | MATα <i>his3Δ1 leu2Δ0 lys2Δ0 ura3Δ0 myo2-REKE::HIS3</i>                              | This study             |
| ABY3589 | NA     | MATα <i>his3Δ1 leu2Δ0 lys2Δ0 ura3Δ0 myo2-3DR-REKE::HIS3::LEU2</i>                    | This study             |
| ABY3590 | NA     | MATα <i>his3Δ1 leu2Δ0 lys2Δ0 ura3Δ0 myo2-3DR-GFP::URA3</i>                           | This study             |
| ABY3591 | NA     | MATα <i>his3Δ1 leu2Δ0 lys2Δ0 ura3Δ0 myo2-REKE-GFP::URA3</i>                          | This study             |
| ABY3592 | NA     | MATα <i>his3Δ1 leu2Δ0 lys2Δ0 ura3Δ0 myo2-3DR-REKE-GFP::HIS3::URA3</i>                | This study             |
| ABY3410 | NA     | MATα <i>his3Δ1 leu2Δ0 lys2Δ0 ura3Δ0 GFP-SEC4::URA3</i>                               | This study             |
| ABY3597 | NA     | MATα <i>his3Δ1 leu2Δ0 lys2Δ0 ura3Δ0 myo2-3DR::HIS3 GFP-SEC4::URA3</i>                | This study             |
| ABY3598 | NA     | MATα <i>his3Δ1 leu2Δ0 lys2Δ0 ura3Δ0 myo2-REKE::HIS3 GFP-SEC4::URA3</i>               | This study             |
| ABY3599 | NA     | MATα <i>his3Δ1 leu2Δ0 lys2Δ0 ura3Δ0 myo2-3DR-REKE::HIS3::LEU2 GFP-SEC4::URA3</i>     | This study             |
| ABY3593 | NA     | MATα <i>his3Δ1 leu2Δ0 lys2Δ0 ura3Δ0 mitoRFP::URA3</i>                                | This study             |
| ABY3594 | NA     | MATα <i>his3Δ1 leu2Δ0 lys2Δ0 ura3Δ0 myo2-3DR::HIS3 mitoRFP::URA3</i>                 | This study             |
| ABY3595 | NA     | MATα <i>his3Δ1 leu2Δ0 lys2Δ0 ura3Δ0 myo2-REKE::HIS3 mitoRFP::URA3</i>                | This study             |
| ABY3596 | NA     | MATα <i>his3Δ1 leu2Δ0 lys2Δ0 ura3Δ0 myo2-3DR-REKE::HIS3::LEU2 mitoRFP::URA3</i>      | This study             |
| ABY3414 | NA     | MATα <i>his3Δ1 leu2Δ0 lys2Δ0 ura3Δ0 SEC15-GFP::kanMX6</i>                            | This study             |
| ABY3702 | NA     | MATα <i>his3Δ1 leu2Δ0 lys2Δ0 ura3Δ0 myo2-3DR-REKE::HIS3::LEU2 SEC15-GFP::kanMX6</i>  | This study             |
| ABY126  | NY17   | MATα <i>ura3-52 sec6-4</i>                                                           | P. Novick <sup>b</sup> |
| ABY3577 | NA     | MATa <i>ade2-1oc can1-100 his3-11,15 leu2-3,112 trp1-1 ura3-1 MYO2-2IQ-GFP::URA3</i> | This study             |
| ABY3578 | NA     | MATa <i>ade2-1oc can1-100 his3-11,15 leu2-3,112 trp1-1 ura3-1 MYO2-4IQ-GFP::URA3</i> | This study             |
| ABY3579 | NA     | MATa <i>ade2-1oc can1-100 his3-11,15 leu2-3,112 trp1-1 ura3-1 MYO2-6IQ-GFP::URA3</i> | This study             |
| ABY3580 | NA     | MATa <i>ade2-1oc can1-100 his3-11,15 leu2-3,112 trp1-1 ura3-1 MYO2-8IQ-GFP::URA3</i> | This study             |
| ABY3704 | NA     | MATα <i>his3Δ1 leu2Δ0 lys2Δ0 ura3Δ0 GFP-Tub1::URA3</i>                               | This study             |
| ABY3705 | NA     | MATα <i>his3Δ1 leu2Δ0 lys2Δ0 ura3Δ0 myo2-3DR::HIS3 GFP-Tub1::URA3</i>                | This study             |
| ABY3706 | NA     | MATα <i>his3Δ1 leu2Δ0 lys2Δ0 ura3Δ0 myo2-REKE::HIS3 GFP-Tub1::URA3</i>               | This study             |
| ABY3707 | NA     | MATα <i>his3Δ1 leu2Δ0 lys2Δ0 ura3Δ0 myo2-3DR-REKE::HIS3::LEU2 GFP-Tub1::URA3</i>     | This study             |

<sup>a</sup>C. Boone, University of Toronto, Toronto, Ontario, Canada.

<sup>b</sup>P. Novick, University of California San Diego, San Diego, CA.
